# Supplementary material for: Deep learning predicts hip fracture using confounding patient and healthcare variables
Source: PubMed Central journal article supplement (PMC6550136; doi:10.1038/s41746-019-0105-1), 2019-04-30
Supplement: 41746_2019_105_MOESM1_ESM.pdf [file 41746_2019_105_MOESM1_ESM.pdf]

**Supplementary Table 1: Scalar Variable Classifications and Descriptions.**

| <b>Variable</b>         | <b>Class</b>     | <b>Description</b>                                                                           |
|-------------------------|------------------|----------------------------------------------------------------------------------------------|
| Fracture                | Disease          | radiologist documented fracture in the impression report (abstracted with NLP)               |
| Age                     | Patient          | patient age (years)                                                                          |
| Gender                  | Patient          | patient's gender                                                                             |
| BMI                     | Patient          | patient's body mass index (kg/m2)                                                            |
| Fall                    | Patient          | clinical history of patient falling (abstracted from radiologist's report with regex)        |
| Pain                    | Patient          | clinical history of patient reporting pain (abstracted from radiologist's report with regex) |
| Department              | Hospital Process | hospital setting                                                                             |
| Technician              | Hospital Process | technician who acquired the radiograph                                                       |
| Radiologist             | Hospital Process | radiologist who interpreted the radiograph                                                   |
| Scanner Manufacturer    | Hospital Process | company that manufactured the scanner (included in dicom header)                             |
| Scanner Model           | Hospital Process | device that acquired the radiograph                                                          |
| Time to Initial Interp. | Hospital Process | wait time between image acquisition and the initial interpretation (hours)                   |
| Time to Final Interp.   | Hospital Process | wait time between image acquisition and the final interpretation (hours)                     |
| Order Date              | Hospital Process | study day that the image was acquired (days since first scan acquired)                       |
| Order Weekday           | Hospital Process | day of week of 'Order Date'                                                                  |
| Order Time              | Hospital Process | time the image was ordered                                                                   |
| Order Priority          | Hospital Process | whether the order was routine or urgent                                                      |
| Imaging Wait Time       | Hospital Process | wait time between image order and image acquisition (hours)                                  |
| Laterality              | Hospital Process | side of patient that was imaged                                                              |
| Radiation Dose          | Hospital Process | dose of radiation used (uAs)                                                                 |

**Supplementary Table 2: Scalar Variable Representations and Binarization.**

| <b>Variable</b>         | <b>Original Representation (factor levels)</b>                                                                                 | <b>Binarization</b>               |
|-------------------------|--------------------------------------------------------------------------------------------------------------------------------|-----------------------------------|
| Fracture                | logical                                                                                                                        | is fracture?                      |
| Age                     | numeric                                                                                                                        | age >= 63                         |
| Gender                  | nominal (male, female)                                                                                                         | is female?                        |
| BMI                     | numeric                                                                                                                        | bmi >= 26                         |
| Fall                    | logical                                                                                                                        | has recent fall?                  |
| Pain                    | logical                                                                                                                        | has pain?                         |
| Department              | nominal (emergency department, inpatient, outpatient)                                                                          | emergency department or inpatient |
| Technician              | nominal (lortiz, sthankachan, technologist, other_valid_entry)                                                                 | Lortiz or Sthankachan             |
| Radiologist             | nominal (alex, darren, sridhar, other_valid_entry)                                                                             | Darren or Sridhar                 |
| Scanner Manufacturer    | nominal (Fujifilm, GE, Konica, Philips)                                                                                        | GE or Konica                      |
| Scanner Model           | nominal (x0862, x5000, bvFamily, bvFamilyXa, cs7, definium5000, discoveryXr656, essentaDr, optimaXr220, thunderPlatform, wdr1) | thunderPlatform or x5000          |
| Time to Initial Interp. | numeric                                                                                                                        | time >= 114 minutes               |
| Time to Final Interp.   | numeric                                                                                                                        | time >= 202 minutes               |
| Order Date              | numeric                                                                                                                        | >= 4.6 years into the study       |
| Order Weekday           | ordinal (Sunday, Monday, Tuesday, ..., Saturday)                                                                               | weekday (M-F) or weekend (Sa,Su)  |
| Order Time              | numeric                                                                                                                        | time after 1:50pm                 |
| Order Priority          | logical                                                                                                                        | is urgent?                        |
| Imaging Wait Time       | numeric                                                                                                                        | wait >= 32 minutes                |
| Laterality              | nominal (Left, Right, Bilateral)                                                                                               | one-side or bilateral             |
| Radiation Dose          | numeric                                                                                                                        | dose >= 9 uAs                     |

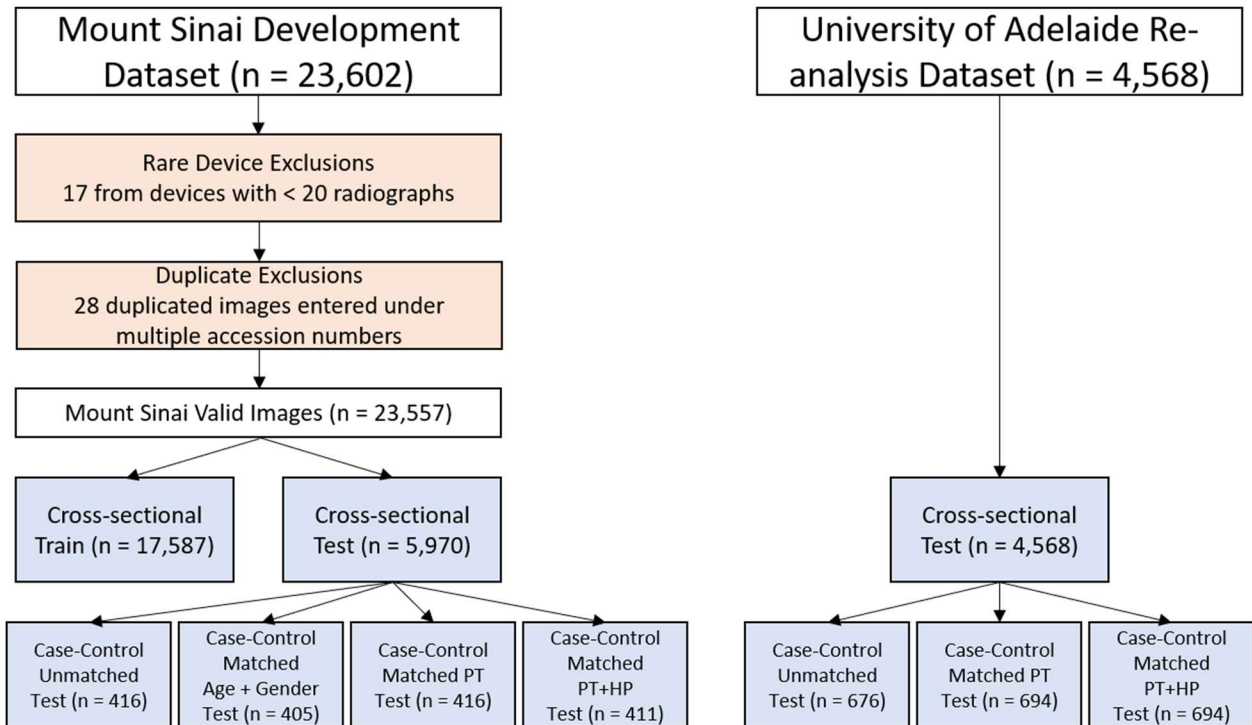

**Supplementary Figure 1: Cohort Waterfall Schematic with Preprocessing Exclusions and Subsampling.**

**Supplementary Table 3: Characteristics of MSH Samples labelled as fracture or normal.**

| <b>Fracture</b>           | <b>FALSE</b> | <b>TRUE</b> |
|---------------------------|--------------|-------------|
| No. radiographs           | 22,778       | 779         |
| No. patients              | 8,736        | 288         |
| No. scanners              | 11           | 7           |
| No. scanner manufacturers | 4            | 4           |
| Age, mean (SD), years     | 61 (22)      | 74 (22)     |
| Female frequency, No. (%) | 15,022 (66)  | 498 (64)    |
| BMI, mean (SD)            | 28 (7)       | 24 (5)      |
| Fall frequency, No. (%)   | 4,062 (18)   | 291 (37)    |
| Pain frequency, No. (%)   | 11,745 (52)  | 225 (29)    |

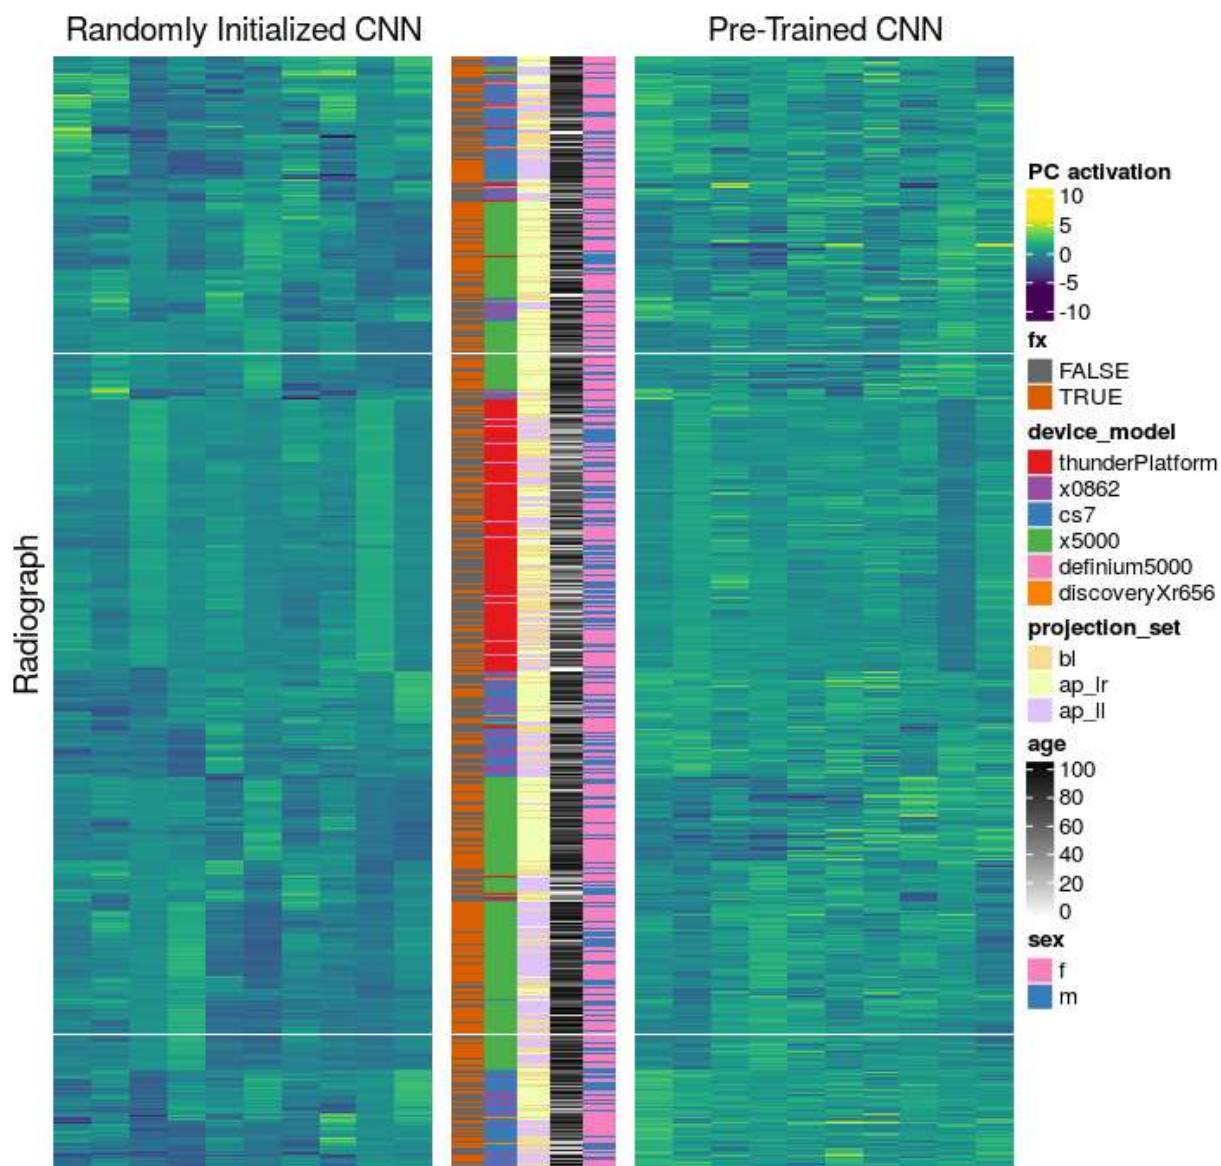

**Supplementary Figure 2: Image Feature Matrix annotated with fracture and covariates.**

The data is represented by a row for each radiograph and a column for each CNN principle component feature or scalar feature. On the left are image principal components computed with a randomly initialized CNN, and on the right are image principal components computed with a CNN pre-trained on ImageNet. The PC activation fill reflects the neural activation of each feature for each radiograph. Radiographs are clustered and annotated with fracture and several covariates. For this figure samples were enriched for fracture by randomly sampling 500 images with and 500 without fracture.

**Supplementary Table 4: Strongest covariate predictor for each image principal component.** Univariate linear regression models were trained to predict each image component with each explanatory covariate, and shown here are the highest scoring predictors for each image component.

| <b>Explanatory Covariate</b> | <b>Image Component</b> | $R^2$ |
|------------------------------|------------------------|-------|
| Scanner Model                | PC1                    | 0.59  |
| Scanner Model                | PC2                    | 0.52  |
| Scanner Model                | PC3                    | 0.65  |
| Scanner Model                | PC4                    | 0.03  |
| Scanner Model                | PC5                    | 0.07  |
| Technician                   | PC6                    | 0.04  |
| Scanner Model                | PC7                    | 0.06  |

**Supplementary Table 5: Performance of image models predicting each binarized variable.**

CNN image features were used to train logistic regression models on binarized forms of each scalar variable and various performance metrics were computed. The threshold column displays the decision cutoff used to compute all the operating point dependent statistics. The AUC 95% confidence interval was determined by DeLong definition for AUC variance.

| Classification target   | auc              | auprc | threshold | spec | sens | acc  | npv  | ppv   | tn    | tp    | fn    | fp    |
|-------------------------|------------------|-------|-----------|------|------|------|------|-------|-------|-------|-------|-------|
| Scanner Model           | 1.00 (1.00-1.00) | 1.00  | 0.283     | 0.99 | 1.00 | 1.00 | 1.00 | 0.992 | 1,767 | 1,265 | 3     | 10    |
| Scanner Manufacturer    | 0.98 (0.98-0.99) | 0.98  | 0.299     | 0.92 | 0.98 | 0.95 | 0.98 | 0.928 | 2,048 | 2,283 | 41    | 178   |
| Order Priority          | 0.79 (0.77-0.80) | 0.57  | 0.255     | 0.56 | 0.92 | 0.68 | 0.93 | 0.523 | 2,203 | 1,880 | 169   | 1,718 |
| Fracture                | 0.78 (0.74-0.81) | 0.11  | 0.033     | 0.74 | 0.74 | 0.74 | 0.99 | 0.094 | 4,283 | 153   | 54    | 1,480 |
| Order Date              | 0.77 (0.76-0.79) | 0.72  | 0.522     | 0.65 | 0.78 | 0.72 | 0.73 | 0.707 | 1,867 | 2,417 | 682   | 1,004 |
| Technician              | 0.72 (0.66-0.78) | 0.28  | 0.138     | 0.57 | 0.77 | 0.60 | 0.94 | 0.223 | 219   | 48    | 14    | 167   |
| Order Weekday           | 0.71 (0.69-0.72) | 0.95  | 0.930     | 0.97 | 0.41 | 0.47 | 0.18 | 0.991 | 664   | 2,161 | 3,125 | 20    |
| Radiologist             | 0.70 (0.67-0.72) | 0.59  | 0.446     | 0.56 | 0.74 | 0.63 | 0.77 | 0.528 | 611   | 538   | 186   | 480   |
| Radiation Dose          | 0.70 (0.67-0.72) | 0.64  | 0.490     | 0.69 | 0.63 | 0.66 | 0.71 | 0.608 | 900   | 616   | 368   | 397   |
| Age                     | 0.67 (0.65-0.68) | 0.65  | 0.485     | 0.62 | 0.64 | 0.63 | 0.64 | 0.630 | 1,859 | 1,920 | 1,061 | 1,130 |
| Fall                    | 0.67 (0.65-0.68) | 0.28  | 0.140     | 0.45 | 0.85 | 0.52 | 0.93 | 0.266 | 2,163 | 968   | 171   | 2,668 |
| Time to Final Interp.   | 0.65 (0.63-0.66) | 0.60  | 0.500     | 0.55 | 0.71 | 0.63 | 0.66 | 0.603 | 1,614 | 2,004 | 830   | 1,322 |
| Department              | 0.63 (0.61-0.65) | 0.50  | 0.334     | 0.63 | 0.58 | 0.61 | 0.72 | 0.475 | 1,241 | 652   | 472   | 720   |
| Laterality              | 0.63 (0.61-0.64) | 0.51  | 0.382     | 0.56 | 0.64 | 0.59 | 0.70 | 0.487 | 2,027 | 1,505 | 850   | 1,588 |
| Time to Initial Interp. | 0.63 (0.60-0.66) | 0.63  | 0.573     | 0.79 | 0.44 | 0.62 | 0.59 | 0.668 | 504   | 274   | 347   | 136   |
| Pain                    | 0.62 (0.61-0.64) | 0.59  | 0.475     | 0.47 | 0.72 | 0.59 | 0.63 | 0.572 | 1,404 | 2,144 | 816   | 1,606 |
| BMI                     | 0.62 (0.60-0.64) | 0.58  | 0.522     | 0.56 | 0.64 | 0.60 | 0.62 | 0.588 | 780   | 872   | 484   | 612   |
| Imaging Wait Time       | 0.61 (0.60-0.63) | 0.60  | 0.435     | 0.46 | 0.73 | 0.60 | 0.62 | 0.586 | 1,112 | 1,870 | 680   | 1,322 |
| Order Time              | 0.58 (0.57-0.60) | 0.59  | 0.496     | 0.52 | 0.60 | 0.56 | 0.56 | 0.569 | 1,523 | 1,840 | 1,212 | 1,395 |
| Gender                  | 0.55 (0.54-0.57) | 0.40  | 0.347     | 0.64 | 0.45 | 0.57 | 0.68 | 0.401 | 2,473 | 937   | 1,160 | 1,400 |

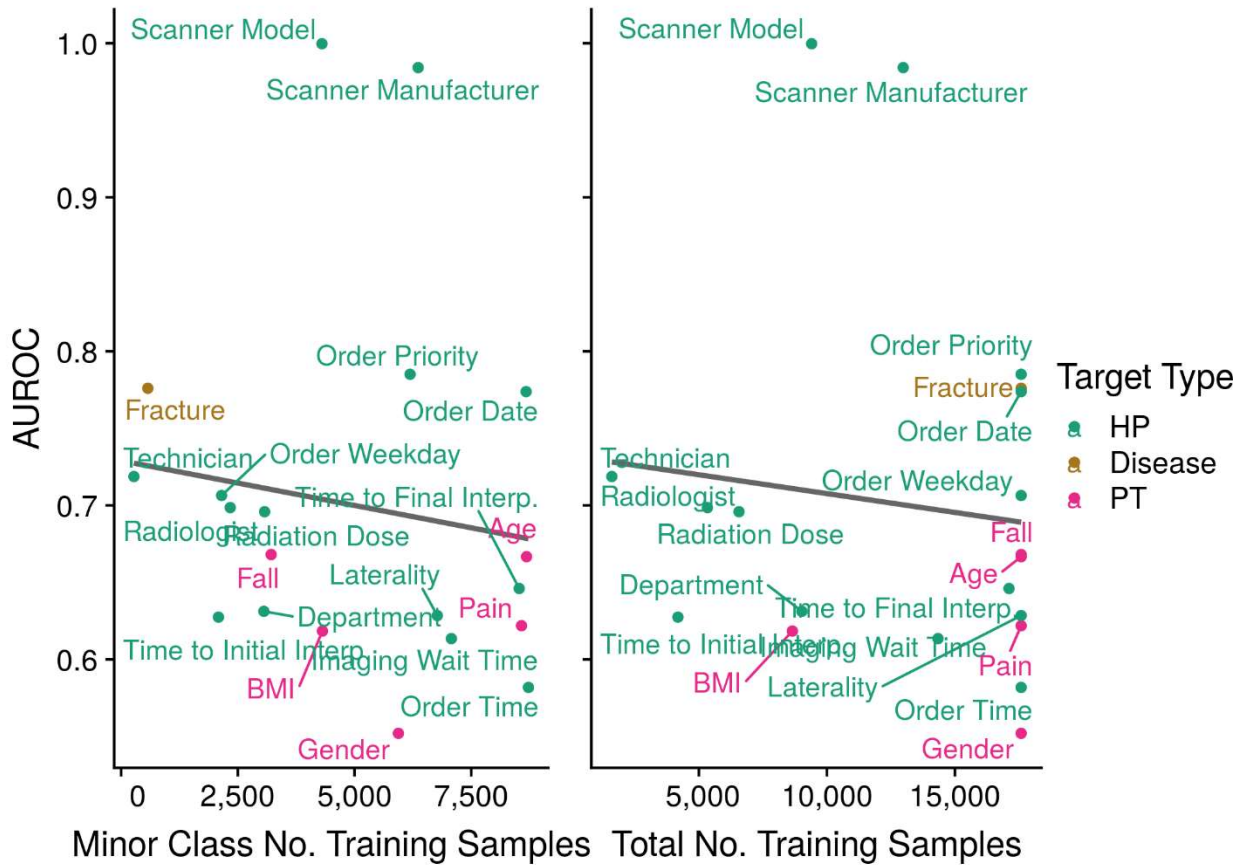

**Supplementary Figure 3: Sample size is not the primary determinant of model performance.** This is a new view into the data displayed in Figure 2A. Here we plot classification performance for each target against two metrics for the amount of training data. On the right, we show performance versus the total number of training samples (e.g., the number of non-missing values), and on the left, we show performance versus the number of examples for the class with less samples in order to account for the substantial class imbalance for labels like fracture. The grey line is a linear regression of performance versus sample size across all model targets.



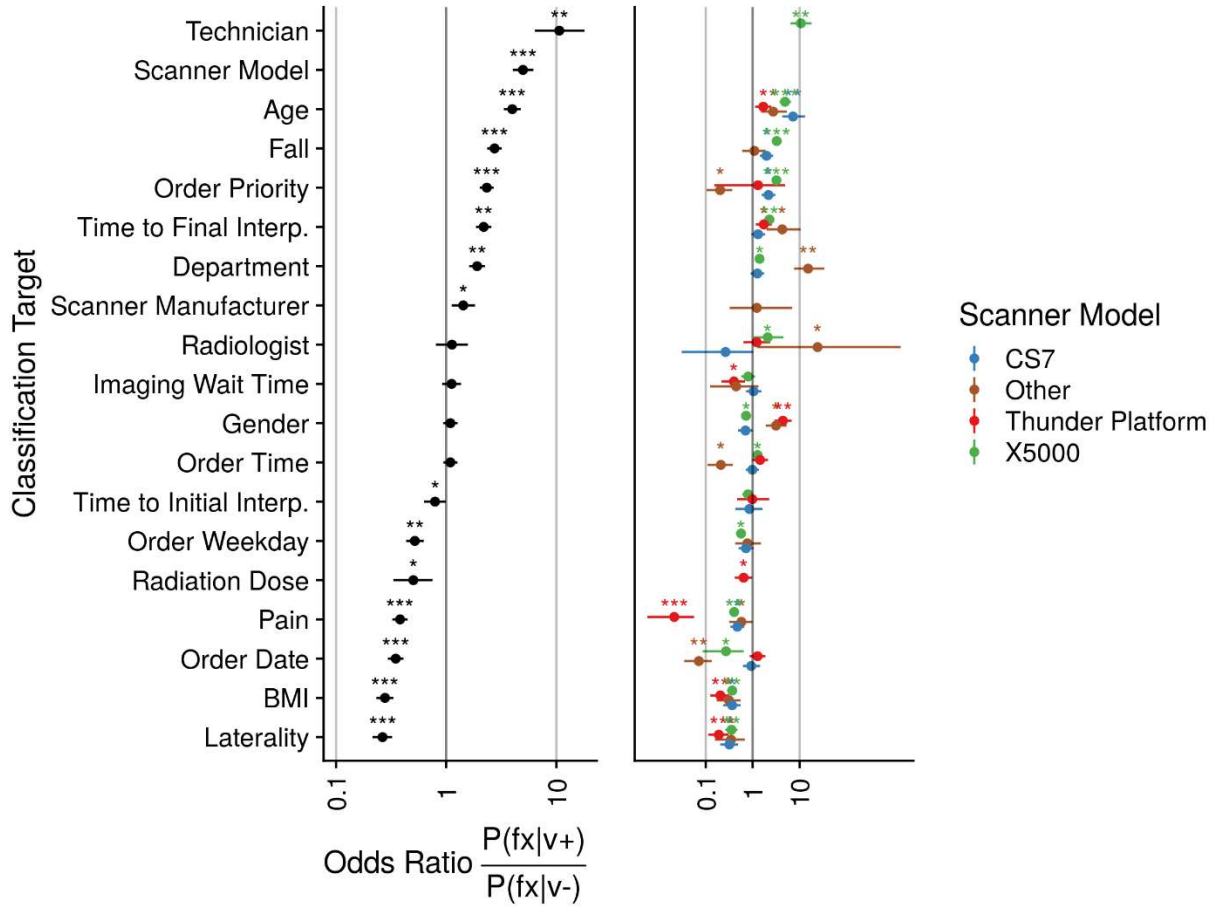

**Supplementary Figure 4: Association between fracture and covariates.** Univariate associations between hip fracture and each covariate were assessed using Fisher’s Exact test on the full dataset (left) and after stratifying by the scanner device (right). Each covariate was binarized as described in the supplemental methods. Significance indicators: \* =  $p < 0.05$ , \*\* =  $p < 1e-10$ , and \*\*\* =  $p < 1e-25$ .

**Supplementary Table 6: Performance of Image Models Predicting each Continuous Variable.** Image features were used to train regression models on each of the 6 continuous covariates, and  $R^2$  values were computed on the test-set.

| <b>Classification Target</b>   | <b><math>R^2</math></b> |
|--------------------------------|-------------------------|
| Order Date                     | 0.39                    |
| Radiation Dose                 | 0.13                    |
| Age                            | 0.07                    |
| Time to Final Interpretation   | 0.06                    |
| BMI                            | 0.06                    |
| Imaging Wait Time              | 0.03                    |
| Order Time                     | 0.02                    |
| Time to Initial Interpretation | 0.02                    |

**Supplementary Table 7: Predicting fracture with combinations of radiographs, patient and hospital process covariates.** Various performance metrics for logistic regression models. The AUC 95% confidence interval was determined by DeLong definition for AUC variance.

| Predictor Set | auc                 | auprc | threshold | spec | sens | acc  | npv  | ppv   | tn    | tp  | fn | fp    |
|---------------|---------------------|-------|-----------|------|------|------|------|-------|-------|-----|----|-------|
| IMG + PT + HP | 0.91<br>(0.90-0.93) | 0.40  | 0.048     | 0.85 | 0.83 | 0.85 | 0.99 | 0.168 | 4,910 | 172 | 35 | 853   |
| HP            | 0.89<br>(0.87-0.91) | 0.37  | 0.037     | 0.78 | 0.86 | 0.78 | 0.99 | 0.121 | 4,478 | 177 | 30 | 1,285 |
| IMG + HP      | 0.89<br>(0.87-0.91) | 0.38  | 0.054     | 0.84 | 0.77 | 0.84 | 0.99 | 0.148 | 4,844 | 160 | 47 | 919   |
| PT + HP       | 0.87<br>(0.85-0.89) | 0.14  | 0.033     | 0.75 | 0.89 | 0.76 | 0.99 | 0.115 | 4,339 | 185 | 22 | 1,424 |
| IMG + PT      | 0.86<br>(0.83-0.88) | 0.24  | 0.045     | 0.83 | 0.78 | 0.83 | 0.99 | 0.143 | 4,797 | 161 | 46 | 966   |
| PT            | 0.79<br>(0.75-0.82) | 0.15  | 0.028     | 0.62 | 0.83 | 0.63 | 0.99 | 0.072 | 3,567 | 171 | 36 | 2,196 |
| IMG           | 0.78<br>(0.74-0.81) | 0.11  | 0.033     | 0.74 | 0.74 | 0.74 | 0.99 | 0.094 | 4,283 | 153 | 54 | 1,480 |

**Supplementary Table 8: Comparison of fracture detection models trained on image and/or patient and hospital process factors.** All test sets are shared, so DeLong paired test was performed to assess for an AUROC difference for each pair of predictors.

| <b>Classifier 1</b> | <b>Classifier 2</b> | <b>p-value,<br/>DeLong paired AUC<br/>comparison</b> |
|---------------------|---------------------|------------------------------------------------------|
| HP                  | IMG + HP            | 0.967                                                |
| IMG                 | PT                  | 0.652                                                |
| PT + HP             | IMG + PT            | 0.045                                                |
| PT + HP             | IMG + HP            | 0.006                                                |
| IMG + PT            | IMG + HP            | 0.002                                                |
| HP                  | PT + HP             | 0.002                                                |
| HP                  | IMG + PT            | 0.001                                                |
| IMG + HP            | IMG + PT + HP       | 1e-06                                                |
| HP                  | IMG + PT + HP       | 3e-07                                                |
| IMG                 | IMG + PT            | 1e-09                                                |
| IMG                 | PT + HP             | 1e-10                                                |
| PT                  | IMG + HP            | 2e-11                                                |
| PT                  | HP                  | 9e-12                                                |
| PT                  | PT + HP             | 8e-13                                                |
| PT                  | IMG + PT            | 2e-13                                                |
| IMG + PT            | IMG + PT + HP       | 2e-14                                                |
| IMG                 | HP                  | 3e-17                                                |
| IMG                 | IMG + HP            | 5e-18                                                |
| IMG                 | IMG + PT + HP       | 1e-21                                                |
| PT                  | IMG + PT + HP       | 3e-27                                                |
| PT + HP             | IMG + PT + HP       | 4e-45                                                |

**Supplementary Table 9: Performance of an image-based fracture detection model evaluated on test-sets with variable case-control sampling strategies.** The AUC 95% confidence interval was determined by DeLong definition for AUC variance.

| Test Cohort                       | auc              | auprc | threshold | spec | sens | acc  | npv  | ppv   | tn    | tp  | fn | fp    |
|-----------------------------------|------------------|-------|-----------|------|------|------|------|-------|-------|-----|----|-------|
| Cross Sectional                   | 0.78 (0.74-0.81) | 0.11  | 0.033     | 0.74 | 0.74 | 0.74 | 0.99 | 0.094 | 4,283 | 153 | 54 | 1,480 |
| Case Control, no matching         | 0.77 (0.73-0.82) | 0.74  | 0.032     | 0.77 | 0.75 | 0.76 | 0.75 | 0.760 | 160   | 155 | 52 | 49    |
| Case Control, matched Age, Gender | 0.76 (0.71-0.81) | 0.73  | 0.029     | 0.66 | 0.78 | 0.72 | 0.74 | 0.703 | 130   | 161 | 46 | 68    |
| Case Control, matched PT          | 0.67 (0.62-0.72) | 0.65  | 0.032     | 0.55 | 0.75 | 0.65 | 0.69 | 0.620 | 114   | 155 | 52 | 95    |
| Case Control, matched PT + HP     | 0.53 (0.47-0.59) | 0.54  | 0.033     | 0.37 | 0.74 | 0.56 | 0.58 | 0.544 | 76    | 153 | 54 | 128   |

**Supplementary Table 10: Comparison of a fracture detection model evaluated on differentially sampled test cohorts.**

| <b>Classifier 1</b>               | <b>Classifier 2</b>               | <b>p-value, DeLong unpaired AUC comparison</b> |
|-----------------------------------|-----------------------------------|------------------------------------------------|
| Cross Sectional                   | Case Control, no matching         | 0.961                                          |
| Case Control, no matching         | Case Control, matched Age, Gender | 0.652                                          |
| Cross Sectional                   | Case Control, matched Age, Gender | 0.571                                          |
| Case Control, matched Age, Gender | Case Control, matched PT          | 0.013                                          |
| Case Control, no matching         | Case Control, matched PT          | 0.003                                          |
| Cross Sectional                   | Case Control, matched PT          | 0.000                                          |
| Case Control, matched PT          | Case Control, matched PT + HP     | 0.000                                          |
| Case Control, matched Age, Gender | Case Control, matched PT + HP     | 1e-09                                          |
| Case Control, no matching         | Case Control, matched PT + HP     | 5e-11                                          |
| Cross Sectional                   | Case Control, matched PT + HP     | 1e-13                                          |

**Supplementary Table 11: Variables used for case-control matching in each dataset.**

| <b>Dataset</b> | <b>Matching</b> | <b>Matched Variables</b>                                                                                                                                                                                                                        |
|----------------|-----------------|-------------------------------------------------------------------------------------------------------------------------------------------------------------------------------------------------------------------------------------------------|
| Adelaide       | Random          | N/A                                                                                                                                                                                                                                             |
| Adelaide       | PT              | Age and Gender                                                                                                                                                                                                                                  |
| Adelaide       | PT+HP           | Age, Gender, Scanner Model, Scanner Manufacturer, Radiologist and Order Weekday                                                                                                                                                                 |
| Mount Sinai    | Random          | N/A                                                                                                                                                                                                                                             |
| Mount Sinai    | dem             | Age and Gender                                                                                                                                                                                                                                  |
| Mount Sinai    | PT              | Age, Gender, BMI, Fall and Pain                                                                                                                                                                                                                 |
| Mount Sinai    | PT+HP           | Age, Gender, BMI, Fall, Pain, Scanner Model, Scanner Manufacturer, Radiologist, Order Weekday, Department, Laterality, Order Date, Order Time, Technician, Radiation Dose, Imaging Wait Time, Time to Initial Interp. and Time to Final Interp. |

**Supplementary Table 12: Population Characteristics of Adelaide Test Cohorts after Subsampling with Variable Matching.**

| <b>Cohort</b>               | <b>crossSectional</b> | <b>caseControl<br/>matchAll</b> | <b>caseControl<br/>matchDem</b> | <b>caseControl<br/>matchNone</b> |
|-----------------------------|-----------------------|---------------------------------|---------------------------------|----------------------------------|
| Sampling                    | Cross-Sectional       | Case-Control                    | Case-Control                    | Case-Control                     |
| Matching                    | NA                    | PT + HP                         | PT                              | NA                               |
| Partition                   | Test                  | Test                            | Test                            | Test                             |
| No. radiographs             | 4,568                 | 694                             | 694                             | 676                              |
| No. scanners                | 14                    | 13                              | 13                              | 14                               |
| No. scanner manufacturers   | 7                     | 6                               | 6                               | 7                                |
| Age, mean (SD), years       | 57 (25)               | 81 (14)                         | 81 (14)                         | 68 (24)                          |
| Fracture frequency, No. (%) | 347 (8)               | 347 (50)                        | 347 (50)                        | 347 (51)                         |
| Female frequency, No. (%)   | 2,135 (47)            | 458 (66)                        | 456 (66)                        | 388 (57)                         |



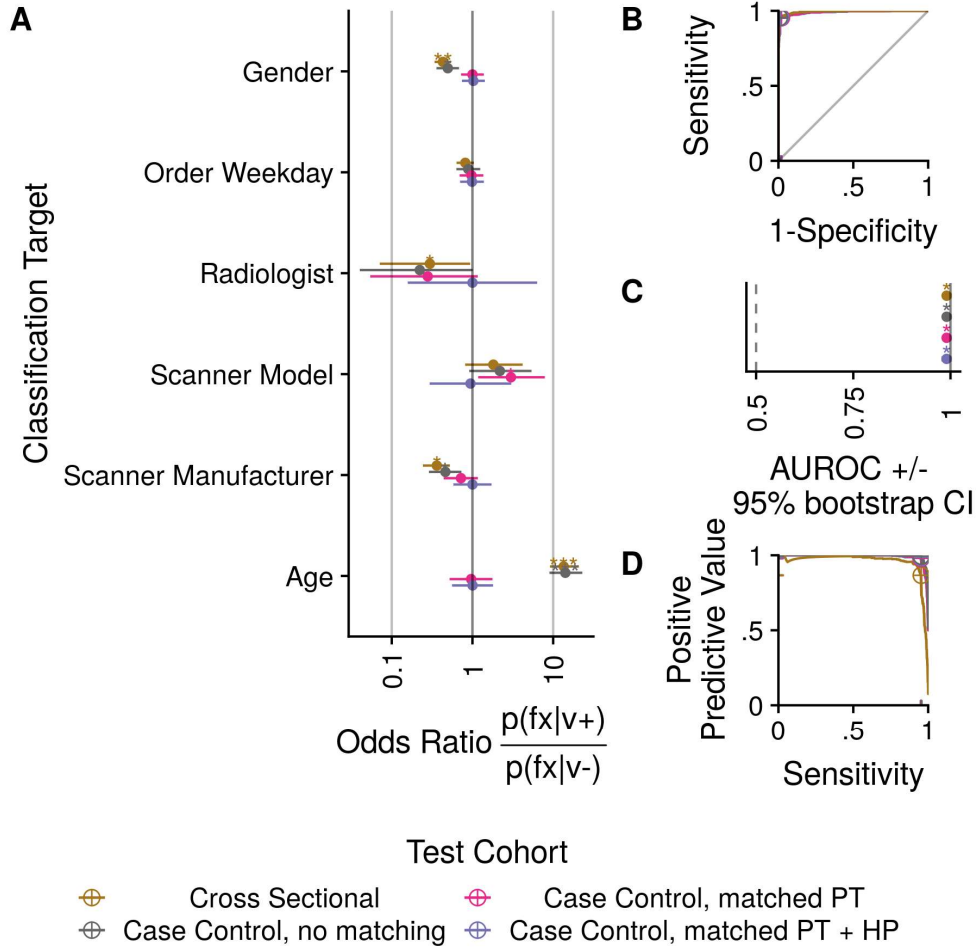

**Supplementary Figure 5: Association of covariates and fracture and the performance of fracture detection models evaluated on differentially sampled test cohorts from the Adelaide dataset.** A) The association between each covariate and fracture, colored by how the test cohort is sampled. (\*) indicate a Fisher's Exact test with  $p < 0.05$ . B) ROC and D) Precision Recall curves for the image-classifier tested on differentially sampled test sets. The best operating point is indicated with crosshairs. (\*) represents a 95% confidence interval that does not include 0.5. C) Summary of (B) with 95% bootstrap confidence intervals.

**Supplementary Table 13: Performance of fracture detection models evaluated on differentially sampled test cohorts from the Adelaide dataset.** The AUC 95% confidence interval was determined by DeLong definition for AUC variance.

| Test Cohort                   | auc           | auprc | threshold | spec | sens | acc  | npv  | ppv  | tn    | tp  | fn | fp |
|-------------------------------|---------------|-------|-----------|------|------|------|------|------|-------|-----|----|----|
| Cross Sectional               | 0.99 (0.99-1) | 0.96  | 0.60      | 0.99 | 0.95 | 0.99 | 1.00 | 0.87 | 4,170 | 331 | 16 | 51 |
| Case Control, matched PT      | 0.99 (0.99-1) | 0.99  | 0.59      | 0.98 | 0.95 | 0.97 | 0.96 | 0.98 | 340   | 331 | 16 | 7  |
| Case Control, no matching     | 0.99 (0.99-1) | 1.00  | 0.60      | 0.99 | 0.95 | 0.97 | 0.95 | 0.99 | 327   | 331 | 16 | 2  |
| Case Control, matched PT + HP | 0.99 (0.98-1) | 0.99  | 0.57      | 0.99 | 0.95 | 0.97 | 0.96 | 0.99 | 342   | 331 | 16 | 5  |

**Supplementary Table 14: Comparison of fracture detection models evaluated on differentially sampled test cohorts from the Adelaide dataset.**

| <b>Classifier 1</b>           | <b>Classifier 2</b>           | <b>p-value,<br/>DeLong unpaired<br/>AUC comparison</b> |
|-------------------------------|-------------------------------|--------------------------------------------------------|
| Cross Sectional               | Case Control, no matching     | 0.75                                                   |
| Case Control, matched PT      | Case Control, matched PT + HP | 0.73                                                   |
| Cross Sectional               | Case Control, matched PT      | 0.33                                                   |
| Case Control, matched PT      | Case Control, no matching     | 0.23                                                   |
| Cross Sectional               | Case Control, matched PT + HP | 0.20                                                   |
| Case Control, matched PT + HP | Case Control, no matching     | 0.14                                                   |

**Supplementary Table 15: Comparing the performance of models trained directly on different predictor sets, and models that ensemble image models with covariates.** Each primary model is a logistic regression model to predict fracture. Naive Bayes ensembles were constructed to combine evidence from the image model and other predictor sets without knowing the interdependencies between them. The AUC 95% confidence interval was determined by DeLong definition for AUC variance.

| Classifier | auc              | aupr<br>c | threshold | spe<br>c | sens | acc  | npv  | ppv   | tn    | tp  | fn | fp    |
|------------|------------------|-----------|-----------|----------|------|------|------|-------|-------|-----|----|-------|
| pt         | 0.79 (0.75-0.82) | 0.15      | 0.028     | 0.62     | 0.83 | 0.63 | 0.99 | 0.072 | 3,567 | 171 | 36 | 2,196 |
| ptHp       | 0.87 (0.85-0.89) | 0.14      | 0.033     | 0.75     | 0.89 | 0.76 | 0.99 | 0.115 | 4,339 | 185 | 22 | 1,424 |
| imgPt      | 0.86 (0.83-0.88) | 0.24      | 0.045     | 0.83     | 0.78 | 0.83 | 0.99 | 0.143 | 4,797 | 161 | 46 | 966   |
| imgPtHp    | 0.91 (0.90-0.93) | 0.40      | 0.048     | 0.85     | 0.83 | 0.85 | 0.99 | 0.168 | 4,910 | 172 | 35 | 853   |
| nb_imgPtHp | 0.90 (0.88-0.93) | 0.33      | 0.052     | 0.86     | 0.82 | 0.86 | 0.99 | 0.175 | 4,969 | 169 | 38 | 794   |
| nb_imgPt   | 0.84 (0.81-0.87) | 0.22      | 0.034     | 0.83     | 0.77 | 0.82 | 0.99 | 0.138 | 4,764 | 160 | 47 | 999   |

**Supplementary Table 16: Statistical comparison of pairs of multimodal and naive Bayes models to predict fracture.**

| <b>Classifier 1</b> | <b>Classifier 2</b> | <b>p-value,<br/>DeLong paired AUC<br/>comparison</b> |
|---------------------|---------------------|------------------------------------------------------|
| pt                  | img_pt              | 2e-13                                                |
| pt                  | nb_img_pt           | 2e-08                                                |
| pt_hp               | img_pt_hp           | 4e-45                                                |
| pt_hp               | nb_img_pt_hp        | 5e-11                                                |
| img_pt              | nb_img_pt           | 0.014                                                |
| img_pt_hp           | nb_img_pt_hp        | 0.003                                                |

**Supplementary Table 17: Characteristics of MSH Samples stratified by the scanner that captured the image**

| Scanner         | No. radiographs | No. patients | Age, mean (SD), years | Female frequency, No. (%) | Fracture frequency, No. (%) | BMI, mean (SD) | Fall frequency, No. (%) | Pain frequency, No. (%) |
|-----------------|-----------------|--------------|-----------------------|---------------------------|-----------------------------|----------------|-------------------------|-------------------------|
| thunderPlatform | 6,879           | 1,940        | 54 (18)               | 4,506 (66)                | 114 ( 1.7)                  | 29 (7)         | 280 ( 4)                | 4,266 (62)              |
| x5000           | 5,570           | 2,507        | 62 (25)               | 3,763 (68)                | 431 ( 7.7)                  | 26 (7)         | 1,334 (24)              | 3,020 (54)              |
| x0862           | 5,106           | 2,053        | 68 (20)               | 3,339 (65)                | 11 ( 0.2)                   | 27 (6)         | 1,497 (29)              | 1,397 (27)              |
| cs7             | 3,836           | 1,908        | 63 (25)               | 2,520 (66)                | 162 ( 4.2)                  | 26 (6)         | 1,035 (27)              | 2,024 (53)              |
| definium5000    | 957             | 384          | 60 (16)               | 617 (64)                  | 0 ( 0.0)                    | 28 (7)         | 80 ( 8)                 | 657 (69)                |
| discoveryXr656  | 516             | 225          | 64 (24)               | 308 (60)                  | 3 ( 0.6)                    | 27 (6)         | 85 (16)                 | 247 (48)                |
| essentaDr       | 357             | 245          | 59 (18)               | 279 (78)                  | 4 ( 1.1)                    | 28 (6)         | 9 ( 3)                  | 218 (61)                |
| wdr1            | 125             | 45           | 60 (16)               | 81 (65)                   | 0 ( 0.0)                    | 27 (4)         | 2 ( 2)                  | 96 (77)                 |
| optimaXr220     | 112             | 52           | 72 (18)               | 68 (61)                   | 0 ( 0.0)                    | 27 (5)         | 19 (17)                 | 33 (29)                 |
| bvFamily        | 79              | 12           | 78 (14)               | 29 (37)                   | 54 (68.4)                   | 23 (4)         | 12 (15)                 | 12 (15)                 |
| bvFamilyXa      | 20              | 6            | 43 (39)               | 10 (50)                   | 0 ( 0.0)                    | 18 (3)         | 0 ( 0)                  | 0 ( 0)                  |

**Supplementary Table 18: Characteristics of MSH Samples stratified by department**

| <b>Department</b>           | <b>Emergency Department</b> | <b>Inpatient</b> | <b>Outpatient</b> | <b>(Missing)</b> |
|-----------------------------|-----------------------------|------------------|-------------------|------------------|
| No. radiographs             | 7,926                       | 4,182            | 3,444             | 8,005            |
| No. patients                | 3,676                       | 1,720            | 1,686             | 2,421            |
| Age, mean (SD), years       | 65 (24)                     | 69 (20)          | 58 (22)           | 54 (19)          |
| Female frequency, No. (%)   | 5,377 (68)                  | 2,559 (61)       | 2,319 (67)        | 5,265 (66)       |
| Fracture frequency, No. (%) | 318 (4.0)                   | 309 (7.4)        | 28 (0.8)          | 124 (1.5)        |
| BMI, mean (SD)              | 26 (7)                      | 26 (6)           | 28 (6)            | 29 (7)           |
| Fall frequency, No. (%)     | 2,661 (34)                  | 1,118 (27)       | 232 (7)           | 342 (4)          |
| Pain frequency, No. (%)     | 3,527 (44)                  | 1,501 (36)       | 2,135 (62)        | 4,807 (60)       |

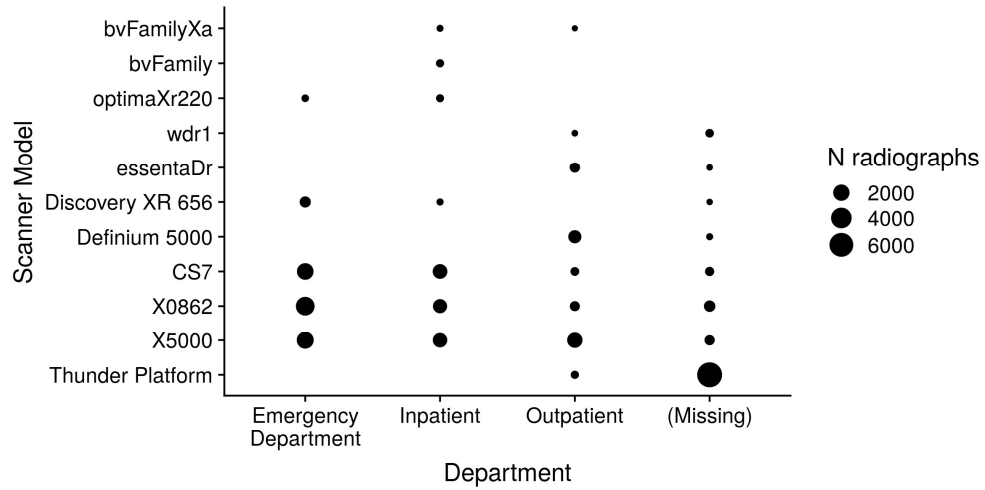

**Supplementary Figure 6: Bivariate distribution of radiographs collected from different scanners and departments.**



**Supplementary Table 19: Performance of Natural Language Processing (NLP) abstraction of radiologists' image impressions.** PPV = positive predictive value, NPV = negative predictive value, FPR = false positive rate.

| <b>Accuracy</b> | <b>Sensitivity</b> | <b>Specificity</b> | <b>PPV</b> | <b>NPV</b> | <b>FPR</b> |
|-----------------|--------------------|--------------------|------------|------------|------------|
| 0.8             | 0.89               | 0.74               | 0.68       | 0.92       | 0.26       |

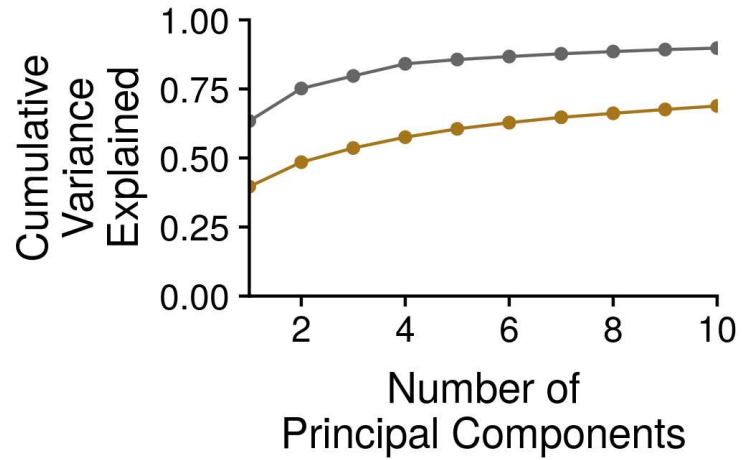

### Encoding CNN

- Randomly Initialized CNN
- Pre-Trained CNN

**Supplementary Figure 7: Cumulative Variance Explained after CNN Feature Dimensionality Reduction.** 69% of image variance in 2,048 CNN features is captured by 10 principal components.

**Supplementary Table 20: Performance of BMI Imputation with different predictor sets.**

| <b>Predictor Set</b> | <b>Imputed HP variables</b> | <b>RMSE</b> | <b>R<sup>2</sup></b> | <b>RMSE SD</b> | <b>R<sup>2</sup> SD</b> |
|----------------------|-----------------------------|-------------|----------------------|----------------|-------------------------|
| IMG                  | FALSE                       | 6.6         | 0.06                 | 0.06           | 0.005                   |
| PT                   | FALSE                       | 6.7         | 0.03                 | 0.07           | 0.004                   |
| HP                   | FALSE                       | 6.6         | 0.05                 | 0.08           | 0.005                   |
| IMG + PT             | FALSE                       | 6.5         | 0.08                 | 0.06           | 0.006                   |
| IMG + HP             | FALSE                       | 6.5         | 0.08                 | 0.06           | 0.007                   |
| IMG + PT + HP        | FALSE                       | 6.5         | 0.09                 | 0.06           | 0.008                   |
| HP                   | TRUE                        | 6.3         | 0.14                 | 0.07           | 0.007                   |
| IMG + HP             | TRUE                        | 6.2         | 0.17                 | 0.06           | 0.009                   |
| IMG + PT + HP        | TRUE                        | 6.1         | 0.18                 | 0.06           | 0.010                   |
